# Supplementary material for: Splice form variant and amino acid changes in MDR49 confers DDT resistance in transgenic Drosophila
Source: Sci Rep. 2016 Mar 22;6:23355. doi: 10.1038/srep23355 (PMC4802207; doi:10.1038/srep23355)

**Title:**

Splice form variant and amino acid changes in MDR49 confers DDT resistance in transgenic *Drosophila*

Keon Mook Seong<sup>a</sup>, Weilin Sun<sup>a</sup>, John M. Clark<sup>b</sup>, Barry R. Pittendrigh<sup>a\*</sup>

<sup>a</sup> Department of Entomology, University of Illinois at Urbana-Champaign, Illinois, USA

<sup>b</sup> Department of Veterinary & Animal Science, University of Massachusetts, Amherst, MA, 01003, USA

\* Corresponding Author

Barry R. Pittendrigh, Department of Entomology, University of Illinois at Urbana-Champaign, Illinois, USA, [pittendr@illinois.edu](mailto:pittendr@illinois.edu)

**Supplementary table S1.** Cloning primers used in this study.

| Gene        | Sequence                      | Remarks                                   |
|-------------|-------------------------------|-------------------------------------------|
| Dmel_MDR49A | F: GCAGTATCGCCTCATAGACACAATGG | For the cloning of full<br>Dmel_MDR49 ORF |
|             | R: TCACTCCAGTTCGCTGTGTTAG     |                                           |
| Dmel_MDR49B | F: CCTCATAGACACAATGACCTTTGTG  |                                           |
|             | R: TCACTCCAGTTCGCTGTGTTAG     |                                           |

**Supplementary table S2. Summary of RNA-seq data from 9I-R and 9I-C.**

| Strains | Replicates | Total reads | Genes         | Coverages | Mapped reads |
|---------|------------|-------------|---------------|-----------|--------------|
| 9I-R    | R1         | 152,800,522 | <i>MDR49A</i> |           | 3,270        |
|         |            |             | <i>MDR49B</i> | 137.3     | 2,733        |
|         |            |             | <i>MDR49N</i> |           | 3,142        |
|         |            |             | <i>MDR50</i>  | 92        | 2,385        |
|         |            |             | <i>MDR65</i>  | 80.3      | 1,499        |
|         | R2         | 152,219,476 | <i>MDR49A</i> |           | 3,492        |
|         |            |             | <i>MDR49B</i> | 159.1     | 3,263        |
|         |            |             | <i>MDR49N</i> |           | ND           |
|         |            |             | <i>MDR50</i>  | 162.2     | 3,953        |
|         |            |             | <i>MDR65</i>  | 84.3      | 1,696        |
|         | R3         | 167,856,374 | <i>MDR49A</i> |           | 4,766        |
|         |            |             | <i>MDR49B</i> | 189.7     | 3,802        |
|         |            |             | <i>MDR49N</i> |           | 4,607        |
|         |            |             | <i>MDR50</i>  | 175.4     | 4,303        |
|         |            |             | <i>MDR65</i>  | 91.3      | 1,697        |
| 9I-C    | R1         | 154,166,490 | <i>MDR49A</i> |           | 5,414        |
|         |            |             | <i>MDR49B</i> | 265.9     | 5,440        |
|         |            |             | <i>MDR50</i>  | 133.7     | 3,265        |
|         |            |             | <i>MDR65</i>  | 112.6     | 2,523        |
|         | R2         | 142,269,050 | <i>MDR49A</i> |           | 4,563        |
|         |            |             | <i>MDR49B</i> | 203.9     | 4,031        |
|         |            |             | <i>MDR50</i>  | 176       | 4,097        |
|         |            |             | <i>MDR65</i>  | 98.9      | 2,234        |
|         | R3         | 155,930,278 | <i>MDR49A</i> |           | 5,652        |
|         |            |             | <i>MDR49B</i> | 224.9     | 4,564        |
|         |            |             | <i>MDR50</i>  | 208       | 5,006        |
|         |            |             | <i>MDR65</i>  | 117.5     | 2,178        |

ND describes ‘not determined’

**Supplementary table S3. Comparison of expression level of *MDR49A* and *MDR49B* in *91-R* and *91-C*, based on RNA-seq data.**

| Gene          | Expression value* |             | ratio** | <i>p</i> -value |
|---------------|-------------------|-------------|---------|-----------------|
|               | <i>91-R</i>       | <i>91-C</i> |         |                 |
| <i>MDR49A</i> | 6.72 ± 0.13       | 8.01 ± 0.21 | 0.86    | <i>p</i> >0.05  |
| <i>MDR49B</i> | 6.67 ± 0.58       | 6.75 ± 0.32 | 0.99    |                 |

\*Expression value was log<sub>2</sub> transformed from raw read coverages.

\*\*Ratio was calculated as *91-R/91-C*.

## **Supplementary figure legend**

**Supplementary figure S1.** Sequence alignment of putative amino acids deduced of the MDR50 proteins from *91-C* and *91-R* strain. Three mutations, T393A, S881F, and V1012L were observed between two strains. The NBDs are homologous for *91-C* and *91-R* strain and each NBD has seven highly conserved motifs. The conserved aromatic, Walker A, Q-loop, ABC signature, Walker B, D-loop, and H-loop are boxed.

**Supplementary figure S2.** Sequence alignments of the putative amino acids deduced from the MDR65 proteins from the *91-C* and *91-R* strains. Three mutations that resulted in amino acid replacements, K277R, I646M, and L992P, were observed when the *91-R* strain was compared with the *91-C* strain. The NBDs were homologous for both strains and each NBD had seven highly conserved motifs (aromatic, Walker A, Q-loop, ABC signature, Walker B, D-loop, and H-loop), which appear in boxes

**Supplementary figure S3.** Prediction of the alternative splice variants in *MDR50*. (A) One alternative splice variant was predicted from *91-C-MDR50*. (B) One alternative splice variant was predicted from *91-R-MDR50*.

**Supplementary figure S4.** Prediction of the alternative splice variants in *MDR65*. (A) One alternative splice variant was predicted from *91-C-MDR65*. (B) One alternative splice variant was predicted from *91-R-MDR65*.

## Supplementary figure S1.

|               |                                                                               |                 |
|---------------|-------------------------------------------------------------------------------|-----------------|
| 91-C-MDR50    | MTVKNGDVVKDDVNSRSQYKTNIVLGAKLESDRDRKSFEPNKKKKSKHDESASDEED                     | 60              |
| 91-R-MDR50    | MTVKNGDVVKDDVNSRSQYKTNIVLGAKLESDRDRKSFEPNKKKKSKHDESASDEED                     | 60              |
| *****         |                                                                               |                 |
| 91-C-MDR50    | GSQYHEDVKQVSFYQLFRYATKKDRALYVIGLLSAVATGLTTPANSLIFGNLANDMIDLS                  | 120             |
| 91-R-MDR50    | GSQYHEDVKQVSFYQLFRYATKKDRALYVIGLLSAVATGLTTPANSLIFGNLANDMIDLS                  | 120             |
| *****         |                                                                               |                 |
| 91-C-MDR50    | GLLESGBKSYRADDASTLLLDKVRQFSLQNTYIGIIMLVCSYLSITCFNYAAHSQILTIR                  | 180             |
| 91-R-MDR50    | GLLESGBKSYRADDASTLLLDKVRQFSLQNTYIGIIMLVCSYLSITCFNYAAHSQILTIR                  | 180             |
| *****         |                                                                               |                 |
| 91-C-MDR50    | SKFFRSILHQDMKWYDFNQSGEVASRMNEDLSKMEDGLAEKVVMFVHYLVAFGSLVLAF                   | 240             |
| 91-R-MDR50    | SKFFRSILHQDMKWYDFNQSGEVASRMNEDLSKMEDGLAEKVVMFVHYLVAFGSLVLAF                   | 240             |
| *****         |                                                                               |                 |
| 91-C-MDR50    | VKGWQLSLVCLTSLPLTFIAMGLVAVATSRLLAKKEVTMYAGAAVVAEGALSGIRTVKAFF                 | 300             |
| 91-R-MDR50    | VKGWQLSLVCLTSLPLTFIAMGLVAVATSRLLAKKEVTMYAGAAVVAEGALSGIRTVKAFF                 | 300             |
| *****         |                                                                               |                 |
| 91-C-MDR50    | GEAKEVAAYKERVVAAKILNKRNMFSGIGFLLWFFIYASYALAFWYGVGLVIESAYEN                    | 360             |
| 91-R-MDR50    | GEAKEVAAYKERVVAAKILNKRNMFSGIGFLLWFFIYASYALAFWYGVGLVIESAYEN                    | 360             |
| *****         |                                                                               |                 |
| 91-C-MDR50    | YDAGTMITVFFSVMMGSMNIGMAAPYIEAFGI <b>TKG</b> ACAKVFHIEQIPEINPIDGEGKKL          | 420             |
| 91-R-MDR50    | YDAGTMITVFFSVMMGSMNIGMAAPYIEAFGI <b>TKG</b> ACAKVFHIEQIPEINPIDGEGKKL          | 420             |
| *****         |                                                                               |                 |
| Aromatic      |                                                                               | Walker A        |
| 91-C-MDR50    | NEPLTTIEFKEVEFQYPTREVSILNKLNLKIHRGQTVALV <b>GPSGCGKST</b> CIQLVQRFYD          | 480             |
| 91-R-MDR50    | NEPLTTIEFKEVEFQYPTREVSILNKLNLKIHRGQTVALV <b>GPSGCGKST</b> CIQLVQRFYD          | 480             |
| *****         |                                                                               |                 |
| Q-loop        |                                                                               |                 |
| 91-C-MDR50    | PQAGNLLFNGTNLKDLDINWLSRIGVV <b>GOE</b> PILFATSIYENIRYGREDA <b>TREE</b> IEAAAA | 540             |
| 91-R-MDR50    | PQAGNLLFNGTNLKDLDINWLSRIGVV <b>GOE</b> PILFATSIYENIRYGREDA <b>TREE</b> IEAAAA | 540             |
| *****         |                                                                               |                 |
| ABC Signature |                                                                               | Walker B D-loop |
| 91-C-MDR50    | AANAAIFIKKLPGYDTLVGERGAQ <b>LSGGQKQRI</b> AIARALIRDPE <b>ILLDEATSALD</b> TAS  | 600             |
| 91-R-MDR50    | AANAAIFIKKLPGYDTLVGERGAQ <b>LSGGQKQRI</b> AIARALIRDPE <b>ILLDEATSALD</b> TAS  | 600             |
| *****         |                                                                               |                 |
| H-loop        |                                                                               |                 |
| 91-C-MDR50    | EAKVQAALAEKVSAGRRTII <b>VAHRL</b> STVRRADRIIVINKGEVVESGTHQELMELKDHYFNL        | 660             |
| 91-R-MDR50    | EAKVQAALAEKVSAGRRTII <b>VAHRL</b> STVRRADRIIVINKGEVVESGTHQELMELKDHYFNL        | 660             |
| *****         |                                                                               |                 |
| 91-C-MDR50    | VTTQLGEDDGSVLSPGTGDIYKNFDIKDEDEEEIKVLSSEDEDEDVMVTDEKNKKKKMKVK                 | 720             |
| 91-R-MDR50    | VTTQLGEDDGSVLSPGTGDIYKNFDIKDEDEEEIKVLSSEDEDEDVMVTDEKNKKKKMKVK                 | 720             |
| *****         |                                                                               |                 |
| 91-C-MDR50    | DPNEVKPMLEVMMKNKPEWLQIAVGCISSVIMGCAMPFAVLFGSILQILSVKDNDQYVR                   | 780             |
| 91-R-MDR50    | DPNEVKPMLEVMMKNKPEWLQIAVGCISSVIMGCAMPFAVLFGSILQILSVKDNDQYVR                   | 780             |
| *****         |                                                                               |                 |
| 91-C-MDR50    | ENSNQYSLYFLIAGIVVGIATFLQIYFFGIAGERLTERLRGLMFEAMLRQEVAFDDKAN                   | 840             |
| 91-R-MDR50    | ENSNQYSLYFLIAGIVVGIATFLQIYFFGIAGERLTERLRGLMFEAMLRQEVAFDDKAN                   | 840             |
| *****         |                                                                               |                 |
| 91-C-MDR50    | GTGSLCARLSGDAAAVQGATGQRIGTIIQISISTLALGIALSMYEWLSGLVALAFTPFIL                  | 900             |
| 91-R-MDR50    | GTGSLCARLSGDAAAVQGATGQRIGTIIQISISTLALGIALSMYEWLSGLVALAFTPFIL                  | 900             |
| *****         |                                                                               |                 |
| 91-C-MDR50    | IAFYMQRTLMAKENMGSAKTMENCTKLAVEVVSNI RTVASLGREEMFHQNYIGMLIPAVE                 | 960             |
| 91-R-MDR50    | IAFYMQRTLMAKENMGSAKTMENCTKLAVEVVSNI RTVASLGREEMFHQNYIGMLIPAVE                 | 960             |
| *****         |                                                                               |                 |
| 91-C-MDR50    | ISKRNTHFRGLVYGLARSLMFFAYAAACMYGTWCVIHRGILFGDVFKVSQALIMGTASIA                  | 1020            |
| 91-R-MDR50    | ISKRNTHFRGLVYGLARSLMFFAYAAACMYGTWCVIHRGILFGDVFKVSQALIMGTASIA                  | 1020            |
| *****         |                                                                               |                 |
| 91-C-MDR50    | NALAFAPNMQKGVSAAKTIFTFLRRQPSIVDRPGVSRDPWHSEGYVRFDKVKFSYPTRSE                  | 1080            |
| 91-R-MDR50    | NALAFAPNMQKGVSAAKTIFTFLRRQPSIVDRPGVSRDPWHSEGYVRFDKVKFSYPTRSE                  | 1080            |
| *****         |                                                                               |                 |
| 91-C-MDR50    | IQVLKGLELAVSKGQKIALVGPSCGCKSTCIQLIQRFYDVDEGATLIDECVNRVSMTNL                   | 1140            |
| 91-R-MDR50    | IQVLKGLELAVSKGQKIALVGPSCGCKSTCIQLIQRFYDVDEGATLIDECVNRVSMTNL                   | 1140            |
| *****         |                                                                               |                 |
| 91-C-MDR50    | RNQLGIVSQEPILFDRTIRENISYGDNARNVTDQEIISACKKSNIHEFIANLPLGYDTRM                  | 1200            |
| 91-R-MDR50    | RNQLGIVSQEPILFDRTIRENISYGDNARNVTDQEIISACKKSNIHEFIANLPLGYDTRM                  | 1200            |
| *****         |                                                                               |                 |
| 91-C-MDR50    | GEKGAQLSGGQKQRIAIARALIRNPKIMLLDEATSALDAESEKVVQDALDAASEGRTTIS                  | 1260            |
| 91-R-MDR50    | GEKGAQLSGGQKQRIAIARALIRNPKIMLLDEATSALDAESEKVVQDALDAASEGRTTIS                  | 1260            |
| *****         |                                                                               |                 |
| 91-C-MDR50    | IAHRLSTVVHSDVIFVFENGLVCEAGDHQQLANRGLYYTLYKLQSGAM                              | 1309            |
| 91-R-MDR50    | IAHRLSTVVHSDVIFVFENGLVCEAGDHQQLANRGLYYTLYKLQSGAM                              | 1309            |
| *****         |                                                                               |                 |

## Supplementary figure S2.

|            |                                                               |      |
|------------|---------------------------------------------------------------|------|
| 91-C-MDR65 | MERDEVSTSSSEKGSQEEAPMAEGLEPTEPIAFLKLFSTYGEIGWLFFGFIMCCIKAL    | 60   |
| 91-R-MDR65 | MERDEVSTSSSEKGSQEEAPMAEGLEPTEPIAFLKLFSTYGEIGWLFFGFIMCCIKAL    | 60   |
| 91-C-MDR65 | *****                                                         |      |
| 91-C-MDR65 | TLPAVVIYSEFTSMLVDRAMQFGTSSNVHALPLFGGKTLTNASREENNEALYDDISY     | 120  |
| 91-R-MDR65 | TLPAVVIYSEFTSMLVDRAMQFGTSSNVHALPLFGGKTLTNASREENNEALYDDISY     | 120  |
| 91-C-MDR65 | *****                                                         |      |
| 91-C-MDR65 | GILLTIASVVMFISGIFSVDFNMVALRQVTRMRIKLFSSVIRQDIGWHDLASKQNFQTS   | 180  |
| 91-R-MDR65 | GILLTIASVVMFISGIFSVDFNMVALRQVTRMRIKLFSSVIRQDIGWHDLASKQNFQTS   | 180  |
| 91-C-MDR65 | *****                                                         |      |
| 91-C-MDR65 | MVDDVEKIRDGISEKVGHFVYLVGFIITVAISFSYGWKLTAVSSYIPLVILLNYYVAK    | 240  |
| 91-R-MDR65 | MVDDVEKIRDGISEKVGHFVYLVGFIITVAISFSYGWKLTAVSSYIPLVILLNYYVAK    | 240  |
| 91-C-MDR65 | *****                                                         |      |
| 91-C-MDR65 | FQGKLTAREQESYAGAGNLAEEILSSIRTVVSFGGEKSEVQRYENFLVPARKASQWKGA   | 300  |
| 91-R-MDR65 | FQGKLTAREQESYAGAGNLAEEILSSIRTVVSFGGERSEVQRYENFLVPARKASQWKGA   | 300  |
| 91-C-MDR65 | *****                                                         |      |
| 91-C-MDR65 | SGLSDAVLKSMYLYLSCAGAFWYGVNLIIDDRNVENKEYTPAILMIAFFGIIVGADNIART | 360  |
| 91-R-MDR65 | SGLSDAVLKSMYLYLSCAGAFWYGVNLIIDDRNVENKEYTPAILMIAFFGIIVGADNIART | 360  |
| 91-C-MDR65 | *****                                                         |      |
| 91-C-MDR65 | APFLESFATARGCATNLFKVIDLTSKIDPLSTDGKLLNYGLRGDVEFQDVFFHYPSRPEV  | 420  |
| 91-R-MDR65 | APFLESFATARGCATNLFKVIDLTSKIDPLSTDGKLLNYGLRGDVEFQDVFFHYPSRPEV  | 420  |
| 91-C-MDR65 | *****                                                         |      |
| 91-C-MDR65 | IVHRGLNIRIRAGQTVALVGSSGCGKSTCVQLLQRFYDPVFGSVLLDDLDIRKYNIQWLR  | 480  |
| 91-R-MDR65 | IVHRGLNIRIRAGQTVALVGSSGCGKSTCVQLLQRFYDPVFGSVLLDDLDIRKYNIQWLR  | 480  |
| 91-C-MDR65 | *****                                                         |      |
| 91-C-MDR65 | SNIAVVGQEPVLFGLGTIAQNISYKPGATQKEIEAAATQAGAHEFITNLPESYRSMIGER  | 540  |
| 91-R-MDR65 | SNIAVVGQEPVLFGLGTIAQNISYKPGATQKEIEAAATQAGAHEFITNLPESYRSMIGER  | 540  |
| 91-C-MDR65 | *****                                                         |      |
| 91-C-MDR65 | GSQLSGGQKQRIAIARALIQNPKILLLDEATSALDYQSEKQVQQALDLASKGRTTIVVSH  | 600  |
| 91-R-MDR65 | GSQLSGGQKQRIAIARALIQNPKILLLDEATSALDYQSEKQVQQALDLASKGRTTIVVSH  | 600  |
| 91-C-MDR65 | *****                                                         |      |
| 91-C-MDR65 | RLSAIRGADKIVFIHDGKVL EEGSHDDLMALEGAYYNMVRAGDINTPDEVEKEDSIEDTK | 660  |
| 91-R-MDR65 | RLSAIRGADKIVFIHDGKVL EEGSHDDLMALEGAYYNMVRAGDINTPDEVEKEDSIEDTK | 660  |
| 91-C-MDR65 | *****                                                         |      |
| 91-C-MDR65 | QKSLALFEKSFETSPLNFEKGQKNSVQFEETIKALIKDTNAQSAEAPPEKPNFFRTFSR   | 720  |
| 91-R-MDR65 | QKSLALFEKSFETSPLNFEKGQKNSVQFEETIKALIKDTNAQSAEAPPEKPNFFRTFSR   | 720  |
| 91-C-MDR65 | *****                                                         |      |
| 91-C-MDR65 | ILQLAKPEWCYLILGTISAVAVGFLYPFAVIFGEFYAALAEKDPEDALRRTAVLSWACL   | 780  |
| 91-R-MDR65 | ILQLAKPEWCYLILGTISAVAVGFLYPFAVIFGEFYAALAEKDPEDALRRTAVLSWACL   | 780  |
| 91-C-MDR65 | *****                                                         |      |
| 91-C-MDR65 | GLAFLTGLVCFLQTYLFNYAGIWLTTMRAMTFNAMVNQEVGWFDENNNSVGALSARLSG   | 840  |
| 91-R-MDR65 | GLAFLTGLVCFLQTYLFNYAGIWLTTMRAMTFNAMVNQEVGWFDENNNSVGALSARLSG   | 840  |
| 91-C-MDR65 | *****                                                         |      |
| 91-C-MDR65 | EAVDIQGAIGYPLSGMIQALSNTISSVSVAMYNNWKLALLCLANCPPIVGSVILEAKMMS  | 900  |
| 91-R-MDR65 | EAVDIQGAIGYPLSGMIQALSNTISSVSVAMYNNWKLALLCLANCPPIVGSVILEAKMMS  | 900  |
| 91-C-MDR65 | *****                                                         |      |
| 91-C-MDR65 | NAVVRKQVIEEACRIATESITNIRTVAGLRREADVIREYTEEIQRVEVLIRQKLWRGV    | 960  |
| 91-R-MDR65 | NAVVRKQVIEEACRIATESITNIRTVAGLRREADVIREYTEEIQRVEVLIRQKLWRGV    | 960  |
| 91-C-MDR65 | *****                                                         |      |
| 91-C-MDR65 | LNSTMQASAFFAYAVALCYGGVLVSEGLLFQDI IKVSETLLYGSMMLAQSLAFTPAFSA  | 1020 |
| 91-R-MDR65 | LNSTMQASAFFAYAVALCYGGVLVSEGLLFQDI IKVSETLLYGSMMLAQSLAFTPAFSA  | 1020 |
| 91-C-MDR65 | *****                                                         |      |
| 91-C-MDR65 | ALIAGHRLFQILDRKPKIQSPMGTIKNTLAKQLNLFEGVRYRGIQFRYPTRPAKILNGL   | 1080 |
| 91-R-MDR65 | ALIAGHRLFQILDRKPKIQSPMGTIKNTLAKQLNLFEGVRYRGIQFRYPTRPAKILNGL   | 1080 |
| 91-C-MDR65 | *****                                                         |      |
| 91-C-MDR65 | DLEVLKGQTVALVGHSKCGKSTCVQLLQRYDDPDEGTIHDHDDIQHDLTLDGVRTKLGI   | 1140 |
| 91-R-MDR65 | DLEVLKGQTVALVGHSKCGKSTCVQLLQRYDDPDEGTIHDHDDIQHDLTLDGVRTKLGI   | 1140 |
| 91-C-MDR65 | *****                                                         |      |
| 91-C-MDR65 | VSQEPFLFERSIAENIAYGDNRRSVSMVEIIAAKSAHAHSFIISLPNGYDTRMGARGTQ   | 1200 |
| 91-R-MDR65 | VSQEPFLFERSIAENIAYGDNRRSVSMVEIIAAKSAHAHSFIISLPNGYDTRMGARGTQ   | 1200 |
| 91-C-MDR65 | *****                                                         |      |
| 91-C-MDR65 | LSGGQKQRIAIARALVRNPKILLLDEATSALDLQSEQLVQQALDTACSGRTTCIVIAHRLS | 1260 |
| 91-R-MDR65 | LSGGQKQRIAIARALVRNPKILLLDEATSALDLQSEQLVQQALDTACSGRTTCIVIAHRLS | 1260 |
| 91-C-MDR65 | *****                                                         |      |
| 91-C-MDR65 | TVQNADVICVIQNGQVVEQGNHMQLISQGGIYAKLHKTQKDH                    | 1302 |
| 91-R-MDR65 | TVQNADVICVIQNGQVVEQGNHMQLISQGGIYAKLHKTQKDH                    | 1302 |
| 91-C-MDR65 | *****                                                         |      |

Supplementary figure S3.

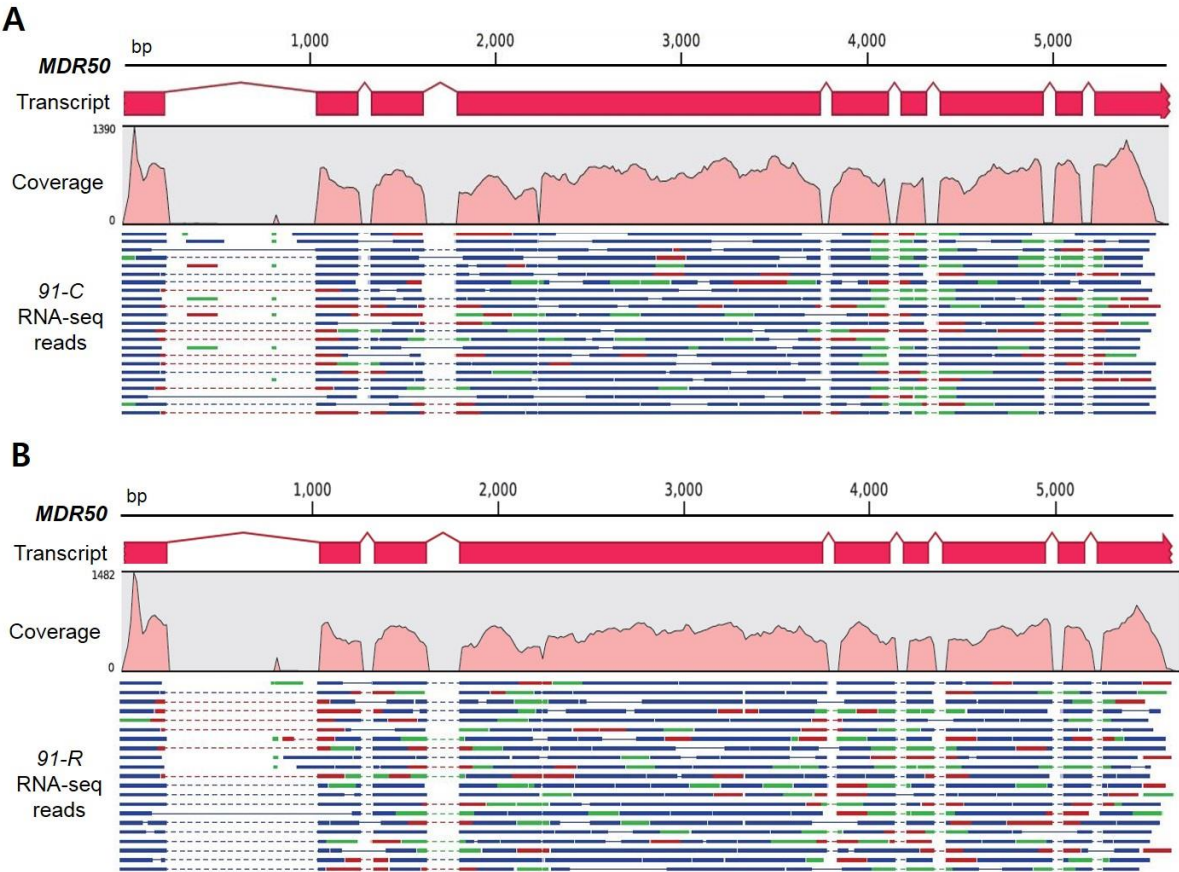

Supplementary figure S4.

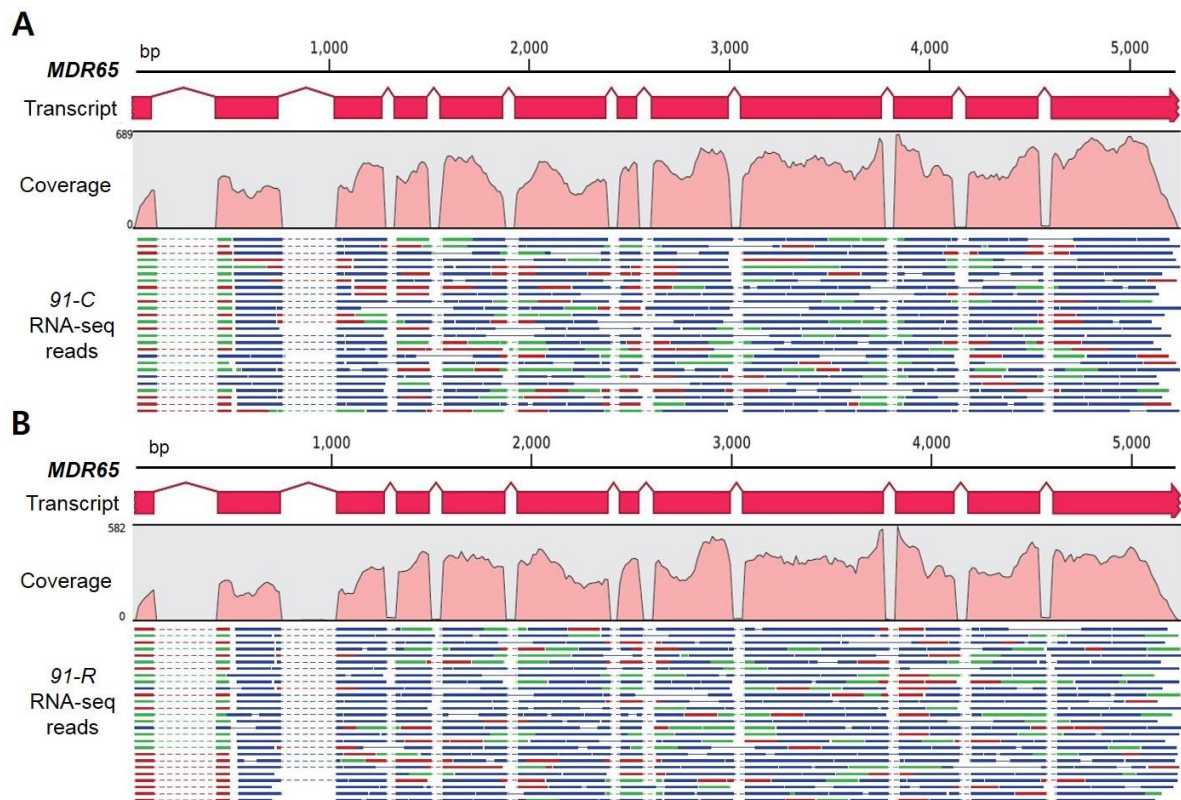

Supplement: Supplementary Information [file srep23355-s1.pdf]
